# Supplementary material
Source: publisher figshare collection journal article supplement (https://acs.figshare.com/ndownloader/files/9195166)
Supplement: Supplementary file 1 [file 9195166]

## Supporting Information

### **Origin of Modified Luminescence Response in Reduced Graphitic Carbon Nitride Nanosheets**

Sayan Bayan<sup>1</sup>, Anupam Midya<sup>2</sup>, Narendar Gogurla<sup>1</sup>, Achintya Singha<sup>3</sup> and Samit K. Ray<sup>1,4\*</sup>

<sup>1</sup>Department of Physics, <sup>2</sup>School of Nanoscience and Technology, Indian Institute of Technology Kharagpur, West Bengal 721302, India

<sup>3</sup>Department of Physics, Bose Institute, Kolkata, West Bengal 700009, India

<sup>4</sup>S. N. Bose National Centre for Basic Sciences, Kolkata, West Bengal 700106, India

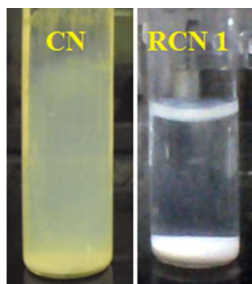

**Figure S1:** Optical image of the pristine (CN) and NaBH<sub>4</sub> treated sample (RCN 1) in water after 24 hrs. The pristine sample is found to be quite stable, while RCN 1 is completely precipitated.

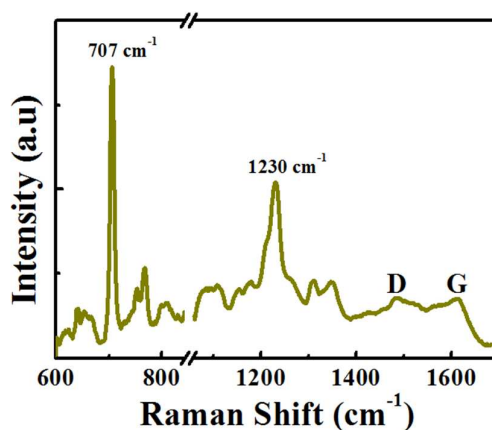

**Figure S2:** Raman spectrum of the pristine g-C<sub>3</sub>N<sub>4</sub> nanosheets. The prominent peak at ~ 707 cm<sup>-1</sup> originates from the in-plane vibration of the heptazine rings. The small features within

1200-1400 including the strong peak at  $\sim 1230\text{ cm}^{-1}$  indicate the C-N stretching vibrations. Further the D and G peaks can be located at the extreme end of the spectrum.<sup>1</sup>

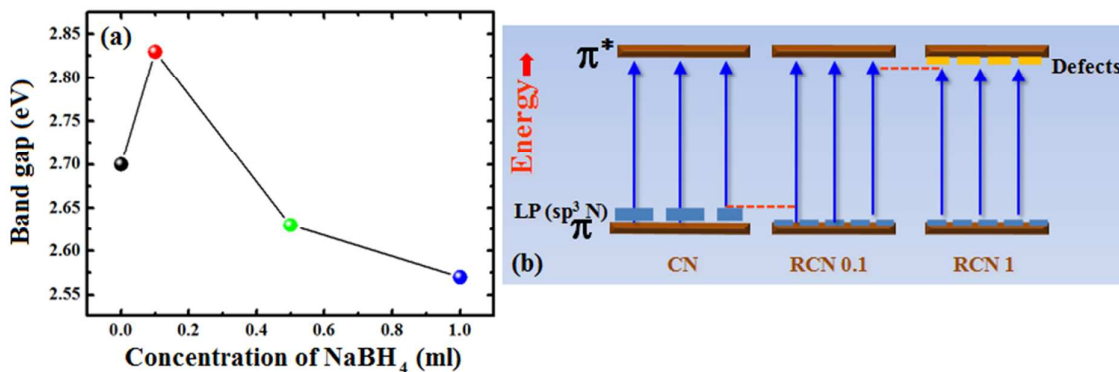

**Figure S3:** (a) Variation in band gap of the nanosheets with NaBH<sub>4</sub> concentration, (b) Schematic representation of the events occurring during the absorption process for different samples.

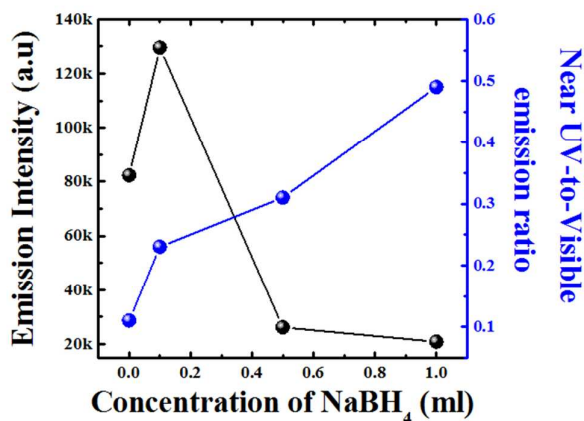

**Figure S4:** Variation in overall emission intensity and ratio of the near UV emission to the visible emission of the nanosheets for different concentration of NaBH<sub>4</sub>.

## References:

(1) Yuan, Y.; Zhang, L.; Xing, J.; Utama, M. I. B.; Lu, X.; Du, K.; Li, Y.; Hu, X.; Wang, S.; Genç, A.; Dunin-Borkowski, R.; Arbiol, J.; Xiong, Q. High-Yield Synthesis and Optical Properties of g-C<sub>3</sub>N<sub>4</sub>. *Nanoscale* 2015, 7, 12343-12350.
